# Supplementary material for: Analysis of Micro-Contaminants in Solid Particles from Direct Injection Gasoline Vehicles
Source: MDPI journal article supplement (doi:10.3390/en15155732), 2022-08-07
Supplement: s1 [file s1]

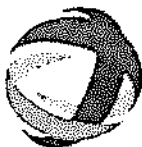

**TOTAL**  
COMMITTED TO BETTER ENERGY

## CERTIFICAT D'ANALYSE

PRODUIT : ULG E10 EURO6 CERT  
LOT: PCE110103G

DATE DE CHARGEMENT: 26.02.2018

| ANALYSES                              | RÉSULTATS               | MÉTHODE         |
|---------------------------------------|-------------------------|-----------------|
| Corrosion cuivre 3h, 50°C             | 1b                      | NF EN ISO 2160  |
| Teneur en C                           | 83.1 % (m/m)            | GC-Calculated   |
| Teneur en H                           | 13.4 % (m/m)            |                 |
| Teneur en O                           | 3.5 % (m/m)             |                 |
| Rapport C/H                           | 6.201                   |                 |
| Rapport H/C                           | 0.161                   |                 |
| Rapport C/O                           | 23.743                  |                 |
| Pouvoir Calorifique Inférieur Mesuré  | 41.27 MJ/kg             | ASTM D 240      |
| Teneur de Silicium                    | < 0.1 mg/kg             | ASTM D 5185     |
| Teneur de Manganèse                   | < 0.3 mg/L              | ASTM 3831       |
| Teneur en gommes actuelles lavées     | < 1 mg/100mL            | NF EN ISO 6246  |
| Teneur en gommes actuelles non-lavées | < 1 mg/100mL            |                 |
| Teneur en Phosphore                   | < 0.2 mg/L              | ASTM D 3231     |
| Période d'Induction                   | >480 minutes            | NF EN ISO 7536  |
| Driveability Index                    | 1100 index              | ASTM D 4814     |
| Aspect visuel                         | Clair et limpide        | VISUELLE        |
| Aspect visuel -7 °C                   | Clair et limpide        |                 |
| Masse volumique à 15 °C               | 747,2 kg/m <sup>3</sup> | NF EN ISO 12185 |
| Pression de vapeur PVSE               | 58.5 kPa                | NF EN 13016-1   |

**TOTAL POLSKA Sp. z o.o.**  
Special Fluids and ACS Sales Specialist

*Aldona Boćzkowska*  
Aldona Boćzkowska

Al. Jana Pawła II 80 – 00-175 Warszawa – Polska  
Tel.: +48 22 481 94 00

Total Polska Sp. z o.o., kapitał zakładowy 56 865 000 PLN wpłacony w całości  
nr KRS 0000019835 Sąd Rejonowy dla m.st. Warszawy, XII Wydział Gospodarczy Krajowego Rejestru Sądowego

| Parametry                                                         |               | Jednostki         | Zakres                | Metoda badań                                          |
|-------------------------------------------------------------------|---------------|-------------------|-----------------------|-------------------------------------------------------|
| Liczba oktanowa badawcza (RON)                                    |               | -                 | min. 98,0             | PN-EN ISO 5164                                        |
| Liczba oktanowa motorowa (MON)                                    |               | -                 | min. 88,0             | PN-EN ISO 5163                                        |
| Zawartość ołowiu                                                  |               | mg/l              | max. 5,0              | PN-EN 237                                             |
| Gęstość w temp. 15 °C                                             |               | kg/m <sup>3</sup> | 720,0 - 775,0         | PN-EN ISO 12185<br>PN-EN ISO 3675                     |
| Zawartość siarki                                                  |               | mg/kg             | max. 10,0             | PN-EN ISO 20884<br>PN-EN ISO 20846<br>PN-EN ISO 13032 |
| Zawartość manganu                                                 |               | mg/l              | max. 2,0              | PN-EN 16135                                           |
| Okres indukcyjny                                                  |               | minuty            | min. 360              | PN-ISO 7536                                           |
| Zawartość żywic obecnych (po przemyciu rozpuszczalnikiem)         |               | mg/100 ml         | max. 5                | PN-EN ISO 6246                                        |
| Badanie działania korodującego na miedź (czas: 3 h, temp.: 50 °C) |               | klasa             | klasa 1               | PN-EN ISO 2160                                        |
| Wygląd                                                            |               | -                 | jasna i przezroczysta | ocena wizualna                                        |
| Zawartość węglowodorów typu                                       |               |                   |                       | PN-EN 15553                                           |
|                                                                   | Olefinowanego | %(V/V)            | max. 18,0             | PN-EN ISO 22854                                       |
|                                                                   | Aromatycznego |                   | max. 35,0             |                                                       |
| Zawartość benzenu                                                 |               | %(V/V)            | max. 1.0              | PN-EN 238<br>PN-EN 12177<br>PN-EN ISO 22854           |

|                              |                                          |        |                                  |                                              |  |
|------------------------------|------------------------------------------|--------|----------------------------------|----------------------------------------------|--|
| Zawartość tlenu              |                                          | %(m/m) | max. 2,7                         | PN-EN 1601<br>PN-EN 13132<br>PN-EN ISO 22854 |  |
| Zawartość związków tlenowych |                                          |        |                                  | PN-EN 1601<br>PN-EN 13132                    |  |
|                              | metanol                                  | %(V/V) | max. 3,0                         | PN-EN ISO 22854                              |  |
|                              | etanol                                   |        | max 5,0                          |                                              |  |
|                              | alkohol izopropylowy                     |        | Zawartość objętościowa           |                                              |  |
|                              | alkohol izobutyłowy                      |        | w produkcie komponowania         |                                              |  |
|                              | alkohol tert-butyłowy                    |        | ograniczona maksymalna zawartość |                                              |  |
|                              | etery (z 5 lub więcej atomami węgla)     |        | tlenu 2,7 % (m/m)                |                                              |  |
|                              | inne związki organiczne zawierające tlen |        |                                  |                                              |  |

|                                    |                                         |                                      |         |             |                |
|------------------------------------|-----------------------------------------|--------------------------------------|---------|-------------|----------------|
| Prężność par (VP) ***)             |                                         |                                      |         |             |                |
|                                    | okres letni                             |                                      | kPa     | 45,0 - 60,0 | PN-EN 13016-1  |
|                                    | okres przejściowy                       |                                      |         | 45,0 - 60,0 |                |
|                                    | okres zimowy                            |                                      |         | 60,0 - 90,0 |                |
| Destylacja                         |                                         |                                      |         |             |                |
|                                    | do temp. 70 °C<br>odparowuje (E70) ***) |                                      | % (V/V) |             | PN-EN ISO 3405 |
|                                    |                                         | okres letni                          |         | 20,0 - 48,0 |                |
|                                    |                                         | okres przejściowy                    |         | 20,0 - 50,0 |                |
|                                    |                                         | okres zimowy                         |         | 22,0 - 50,0 |                |
|                                    |                                         | do temp. 100 °C<br>odparowuje (E100) |         | 46,0 - 71,0 |                |
|                                    |                                         | do temp. 150 °C<br>odparowuje (E150) |         | min. 75,0   |                |
| Temperatura końca destylacji (FBP) |                                         |                                      | °C      | max. 210    | PN-EN ISO 3405 |
| Pozostałość po destylacji          |                                         |                                      | % (V/V) | max. 2      | PN-EN ISO 3405 |
| Indeks lotności (VLI) ***)         |                                         |                                      | -       |             | PN-EN 228      |
|                                    |                                         | okres przejściowy                    |         | max 1150    |                |

\*) Wymagania wg Rozporządzenia Ministra Gospodarki z dnia 9 października 2015 r. w sprawie wymagań jakościowych dla paliw ciekłych (Dz.U. z dnia 23 października 2015 r., poz. 1680).

\*\*) Wymagania wg Rozporządzenia Ministra Gospodarki z dnia 9 października 2015 r. w sprawie metod badania jakości paliw ciekłych (Dz.U. z dnia 23 października 2015 r., poz. 1679).

\*\*\*) Wymagania odnośnie parametrów lotnościowych benzyny dla krajowych warunków klimatycznych są określone w zależności od okresu:

a) letniego – od dnia 1 maja do dnia 30 września.

b) przejściowego – od dnia 1 marca do dnia 30 kwietnia oraz od dnia 1 października do dnia 31 października.

c) zimowego – od dnia 1 listopada do końca lutego.

| Parameters                                           |          | Units             | Range                 | Method                                                |
|------------------------------------------------------|----------|-------------------|-----------------------|-------------------------------------------------------|
| Research Octane Number (RON)                         |          | -                 | min. 98,0             | PN-EN ISO 5164                                        |
| Motor Octane Number (MON)                            |          | -                 | min. 88,0             | PN-EN ISO 5163                                        |
| Lead content                                         |          | mg/l              | max. 5,0              | PN-EN 237                                             |
| Density in 15 °C                                     |          | kg/m <sup>3</sup> | 720,0 - 775,0         | PN-EN ISO 12185<br>PN-EN ISO 3675                     |
| Sulphur content                                      |          | mg/kg             | max. 10,0             | PN-EN ISO 20884<br>PN-EN ISO 20846<br>PN-EN ISO 13032 |
| Manganese content                                    |          | mg/l              | max. 2,0              | PN-EN 16135                                           |
| Induction period                                     |          | minutes           | min. 360              | PN-ISO 7536                                           |
| Resin content present (after washing with solvent)   |          | mg/100 ml         | max. 5                | PN-EN ISO 6246                                        |
| Copper corrosion test(time: 3 h, temperature: 50 °C) |          | class             | class 1               | PN-EN ISO 2160                                        |
| Apperance                                            |          | -                 | clear and transparent | visual assesment                                      |
| The content of hydrocarbons of the type              |          |                   |                       | PN-EN 15553                                           |
|                                                      | Olefin   | %(V/V)            | max. 18,0             | PN-EN ISO 22854                                       |
|                                                      | Aromatic |                   | max. 35,0             |                                                       |
| Benzene content                                      |          | %(V/V)            | max. 1.0              | PN-EN 238<br>PN-EN 12177<br>PN-EN ISO 22854           |

|                          |                                      |        |                                                                                           |                                              |
|--------------------------|--------------------------------------|--------|-------------------------------------------------------------------------------------------|----------------------------------------------|
| Oxygen content           |                                      | %(m/m) | max. 2,7                                                                                  | PN-EN 1601<br>PN-EN 13132<br>PN-EN ISO 22854 |
| Oxygen compounds content |                                      |        |                                                                                           | PN-EN 1601                                   |
|                          | methanol                             | %(V/V) | max. 3,0                                                                                  | PN-EN 13132                                  |
|                          | ethanol                              |        | max 5,0                                                                                   | PN-EN ISO 22854                              |
|                          | isopropyl alcohol                    |        | Volumetric content of 2.7% (m/m) in the blended product limited by maximum oxygen content |                                              |
|                          | isobutyl alcohol                     |        |                                                                                           |                                              |
|                          | tert-butyl alcohol                   |        |                                                                                           |                                              |
|                          | Ethers (with 5 or more carbon atoms) |        |                                                                                           |                                              |
|                          | Other organic oxygenates             |        |                                                                                           |                                              |

|                              |                                  |                               |         |             |                |
|------------------------------|----------------------------------|-------------------------------|---------|-------------|----------------|
| Vapor pressure (VP) ***)     |                                  |                               |         |             |                |
|                              | summer                           |                               | kPa     | 45,0 - 60,0 | PN-EN 13016-1  |
|                              | transition season                |                               |         | 45,0 - 60,0 |                |
|                              | winter                           |                               |         | 60,0 - 90,0 |                |
| Destylacja                   |                                  |                               |         |             |                |
|                              | % Evaporated at 70 °C (E70) ***) |                               | % (V/V) |             | PN-EN ISO 3405 |
|                              |                                  | Summer                        |         | 20,0 - 48,0 |                |
|                              |                                  | Transition period             |         | 20,0 - 50,0 |                |
|                              |                                  | Winter                        |         | 22,0 - 50,0 |                |
|                              |                                  | % Evaporated at 100 °C (E100) |         | 46,0 - 71,0 |                |
|                              |                                  | % Evaporated at 150 °C (E150) |         | min. 75,0   |                |
| Final boiling point (FBP)    |                                  |                               | °C      | max. 210    | PN-EN ISO 3405 |
| Residue                      |                                  |                               | %(V/V)  | max. 2      | PN-EN ISO 3405 |
| Vapour Lock Index (VLI) ***) |                                  |                               | -       |             | PN-EN 228      |
|                              |                                  | Transitional period           |         | max 1150    |                |



\*) Requirements according to the Ordinance of the Minister of Economy of 9 October 2015 on requirements qualitative for liquid fuels (Journal of Laws of 23 October 2015, item 1680).

\*\*) Requirements according to the Ordinance of the Minister of Economy of October 9, 2015 on methods liquid fuel quality tests (Journal of Laws of 23 October 2015, item 1679).

\*\*\*) The requirements for gasoline volatility parameters for domestic climatic conditions are determined depending on the period:

a) summer - from May 1 to September 30.

b) transition - from March 1 to April 30 and from October 1 to October 31.

c) winter - from November 1 to the end of February.
